# Supplementary material for: Impact of the number of repeated inhalations and patient characteristics on the residual amount of inhaled laninamivir octanoate hydrate dry powder in pediatric patients with influenza
Source: PubMed Central journal article supplement (PMC5678805; doi:10.1186/s40780-017-0094-7), 2017-11-08
Supplement: 40780_2017_94_MOESM2_ESM.pdf [file 40780_2017_94_MOESM2_ESM.pdf]

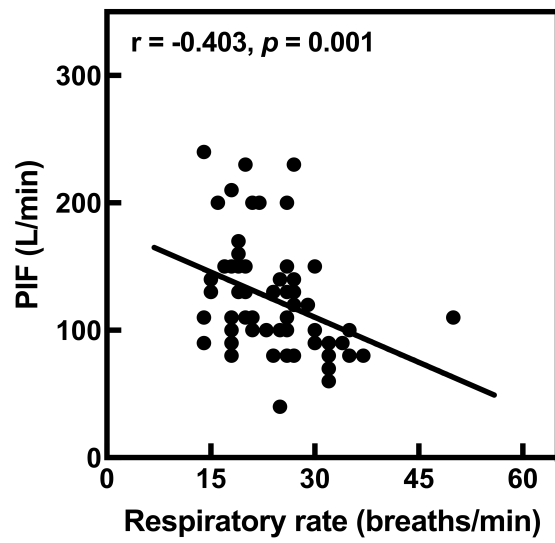

**Additional file 2: Figure S2 Correlation between PIF and respiratory rate in pediatric patients receiving laninamivir dry powder inhaler (n = 64).** Statistical analysis was performed using Spearman correlation coefficient. Each point represents the patients.
