# Supplementary material for: Impact of the number of repeated inhalations and patient characteristics on the residual amount of inhaled laninamivir octanoate hydrate dry powder in pediatric patients with influenza
Source: PubMed Central journal article supplement (PMC5678805; doi:10.1186/s40780-017-0094-7), 2017-11-08
Supplement: 40780_2017_94_MOESM3_ESM.pdf [file 40780_2017_94_MOESM3_ESM.pdf]

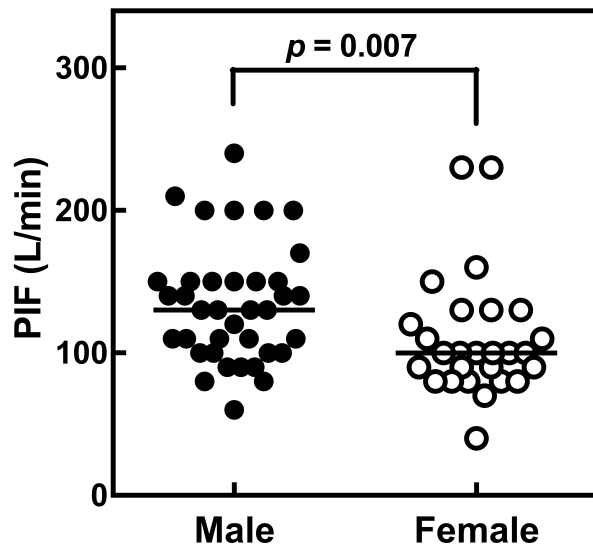

**Additional file 3: Figure S3 Comparisons of PIF between male (n = 37) and female (n = 27) pediatric patients receiving laninamivir dry powder inhaler.**

Statistical analysis was performed using Mann-Whitney *U* test.

Each point represents the patients and median are indicated by horizontal lines.

PIF, peak inspiratory flow
